# Supplementary material for: Simultaneous determination of naphthalimide-labelled monosaccharides in P. cyrtonema Hua. polysaccharides utilizing the HPLC-UV technique
Source: Royal Society of Chemistry journal article supplement (doi:10.1039/d4ay01862a), 2025-01-01
Supplement: d4ay01862a1.pdf [file d4ay01862a1.pdf]

## Supporting Information

### Simultaneous Determination of Naphthalimide-Labelled Monosaccharides within *P. cyrtonema* Hua. Polysaccharides Utilizing HPLC-UV technique

Jiao Du<sup>1,‡</sup> Xue Zhou<sup>1,‡</sup>, Leijing Chen<sup>1,‡</sup>, Liang Xu<sup>1</sup>, and Bin Wang<sup>1,2\*</sup>

1. Key Laboratory of Xin'an Medicine of the Ministry of Education, College of Chinese Medicine, School of Pharmacy, Anhui University of Chinese Medicine, Hefei, 230038, P. R. China.;

2. Institute of Pharmaceutical Chemistry, Anhui Academy of Chinese Medicine, Hefei, 230038, P. R. China;

‡ These authors contributed equally.

Fax: (+86) 551-65169371; E-mail: bw5654@ahcm.edu.cn;

#### Table of Contents:

|                                    |           |
|------------------------------------|-----------|
| <b>1. Box–Behnken experimental</b> | <b>S2</b> |
| <b>2. References</b>               | <b>S4</b> |

## Box–Behnken experimental

Table S1 Levels and code of derivatization variables used in Box–Behnken design.

| Variable            | Coded Levels |          |           |
|---------------------|--------------|----------|-----------|
|                     | -1           | 0        | 1         |
| Temperature (A, °C) | 70           | 80       | 90        |
| Time (B, min)       | 2            | 4        | 6         |
| Kinds of acid (C)   | -1 (HCl)     | 0 (AcOH) | 1 (HCOOH) |
| Molar ratio (D)     | -1 (2: 1)    | 0 (1: 1) | 1 (1: 2)  |

**Table S2** Box–Behnken experimental design and the results for yield of derivatization of ANA- monosaccharide

| Run | A  | B | C  | D  | Yield (%) |
|-----|----|---|----|----|-----------|
| 1   | 70 | 4 | 0  | 0  | 27        |
| 2   | 90 | 6 | 0  | 0  | 21        |
| 3   | 70 | 4 | 0  | 0  | 51        |
| 4   | 90 | 4 | 0  | 0  | 42        |
| 5   | 80 | 4 | -1 | -1 | 34        |
| 6   | 80 | 4 | 1  | -1 | 56        |
| 7   | 80 | 2 | -1 | 1  | 29        |
| 8   | 80 | 4 | 1  | 1  | 18        |
| 9   | 70 | 6 | 0  | -1 | 41        |
| 10  | 90 | 4 | 0  | -1 | 51        |
| 11  | 70 | 4 | 0  | 1  | 22        |
| 12  | 90 | 4 | 0  | 1  | 27        |
| 13  | 80 | 2 | -1 | 0  | 33        |
| 14  | 80 | 2 | -1 | 0  | 50        |
| 15  | 80 | 6 | 1  | 0  | 17        |
| 16  | 80 | 4 | 1  | 0  | 30        |
| 17  | 70 | 6 | -1 | 0  | 47        |
| 18  | 90 | 4 | -1 | 0  | 36        |
| 19  | 70 | 2 | 1  | 0  | 29        |
| 20  | 90 | 4 | 1  | 0  | 24        |
| 21  | 80 | 6 | 0  | -1 | 36        |
| 22  | 80 | 4 | 0  | -1 | 62        |
| 23  | 80 | 4 | 0  | 1  | 17        |
| 24  | 80 | 2 | 0  | 1  | 33        |
| 25  | 80 | 2 | 0  | 0  | 75        |
| 26  | 80 | 4 | 0  | 0  | 72        |
| 27  | 80 | 4 | 0  | 0  | 73        |
| 28  | 80 | 4 | 0  | 0  | 70        |
| 29  | 80 | 6 | 0  | 0  | 71        |

## References

- [1] S. H. Alelaiwi, J. R. McKee, One-Pot Synthesis of Aminated Benzo-Fused Heterocycles and N-Substituted Dibenzothiophenes Via Copper-Catalyzed Ullmann Type Reaction, *ACS. Omega.* 6 (2021) 6009-6016.
- [2] S. Liu, H. Bai, Q. Sun, W. Zhang, J. Qian, Naphthalimide-Based Fluorescent Photoinduced Electron Transfer Sensors for Saccharides, *RSC. Advances.* 5 (2015) 2837-2843.
- [3] J. Koch, M. Pischetsrieder, K. Polborn, T. Severin, Formation of pyridinium betaines by reaction of hexoses with primary amines, *Carbohydr. Res.* 313 (1998) 117-123.
